1 **Determining insulin sensitivity from glucose tolerance tests in Iberian and**  
2 **Landrace pigs**

3

4 J. M. Rodríguez-López<sup>1,a</sup>, M. Lachica<sup>1</sup>, L. González-Valero<sup>1</sup> and I. Fernández-  
5 Figares<sup>1</sup>

6

7 <sup>1</sup>*Department of Physiology and Biochemistry of Animal Nutrition, Estación*  
8 *Experimental del Zaidín, CSIC, Profesor Albareda 1, 18008 Granada, Spain*

9 <sup>a</sup>*Present address: Unité Transformations & Agro-Ressources (EA 7519), Institut*  
10 *Polytechnique UniLaSalle, Université d'Artois, 19 rue Pierre Waguet, 60026*  
11 *Beauvais, France*

12

13 Corresponding author: Ignacio Fernández-Figares. Email: [ifigares@eez.csic.es](mailto:ifigares@eez.csic.es)

14

15 Short title: Insulin sensitivity in Iberian and Landrace pigs

16

17 **Abstract**

18 As insulin sensitivity may help to explain divergences in growth and body  
19 composition between native and modern breeds, metabolic responses to  
20 glucose infusion were measured using an intra-arterial glucose tolerance test  
21 (IAGTT). Iberian (n = 4) and Landrace (n = 5) barrows (47.0 ± 1.2 kg BW), fitted  
22 with a permanent carotid artery catheter were injected with glucose (500 mg/kg  
23 BW) and blood samples collected at -10, 0, 5, 10, 15, 20, 25, 30, 45, 60, 90,  
24 120 and 180 min following glucose infusion. Plasma samples were analysed for  
25 insulin, glucose, lactate, triglycerides, cholesterol, creatinine, albumin and urea.

26 Insulin sensitivity indices were calculated and analysed. Mean plasma glucose,  
27 creatinine and cholesterol concentrations were lower ( $P < 0.01$ ) in Iberian (14,  
28 68 and 22%, respectively) compared with Landrace pigs during the IAGTT.  
29 However, mean plasma insulin, lactate, triglycerides and urea concentrations  
30 were greater ( $P < 0.001$ ) in Iberian (50, 35, 18 and 23%, respectively) than in  
31 Landrace pigs. Iberian pigs had larger area under the curve (AUC) of insulin ( $P$   
32  $< 0.05$ ) and lactate ( $P < 0.1$ ), and smaller ( $P < 0.05$ ) AUC for glucose 0-60 min  
33 compared with Landrace pigs. **Indices for estimating insulin sensitivity in fasting**  
34 **conditions indicated improved  $\beta$ -cell function in Iberian compared with Landrace**  
35 **pigs**, but no difference ( $P > 0.10$ ) in calculated insulin sensitivity index was  
36 found after IAGTT between breeds. A time response ( $P < 0.05$ ) was obtained  
37 for insulin, glucose and lactate so that maximum concentration was achieved 10  
38 and 15 min post-infusion for insulin (Iberian and Landrace pigs, respectively),  
39 immediately post-infusion for glucose, and 20 min post-infusion for lactate,  
40 decreasing thereafter until basal levels. There was no time effect for the rest of  
41 metabolites evaluated. In conclusion, growing Iberian pigs challenged with an  
42 IAGTT showed changes in biochemical parameters and insulin response that  
43 may indicate an early stage of insulin resistance.

44

45 **Keywords:** insulin resistance, metabolism, obesity, *fatty pigs*, *lean pigs*

46

#### 47 **Implications**

48 **The pig has evolved as a complementary alternative research model to**  
49 **laboratory animals for obesity studies in humans. Obesity is characterized by an**  
50 **over-accumulation of body fat and is often linked to insulin resistance. The**

51 Iberian pig, a breed very much appreciated for their expensive cured products,  
52 is a candidate swine model with elevated capacity of fat deposition. We have  
53 shown that growing Iberian pigs also show features compatible with an  
54 installation of early insulin resistance

55

## 56 **Introduction**

57 The Iberian pig is a slow growing native breed of the Mediterranean basin with  
58 much greater whole body fat content than lean-type pigs (Nieto *et al.*, 2002) and  
59 may be, considered as an obese pig breed (Barea *et al.*, 2007; Torres-Rovira *et*  
60 *al.*, 2011, 2012). Compared with conventional breeds, Iberian pigs show a lower  
61 efficiency of energy utilisation for protein deposition in the growing period  
62 (Barea *et al.*, 2007). The greater relative viscera weight (Rivera-Ferre *et al.*,  
63 2005) and total heat production (González-Valero *et al.*, 2016) associated in  
64 part with the greater rate of muscle protein turnover (Rivera-Ferre *et al.*, 2005)  
65 in Iberian compared with lean-type pigs help to explain the low energy efficiency  
66 for growth. In fact, Rivera-Ferre *et al.* (2005) showed that muscle protein  
67 degradation was increased in Iberian pigs resulting in decreased muscle protein  
68 accretion compared with Landrace pigs. Interestingly, insulin resistance at the  
69 muscle level could explain an increased protein degradation (Wang *et al.*, 2006)  
70 affecting overall protein accretion. In a previous study using balanced or lysine  
71 deficient diets at two CP levels (12% and 16% CP), Iberian pigs had greater  
72 fasting serum insulin concentration than Landrace pigs (Fernández-Fígares *et*  
73 *al.*, 2007), suggesting the possibility of insulin resistance in Iberian pigs. We  
74 hypothesised that compared with modern lean breeds Iberian pigs have  
75 decreased insulin sensitivity, which could explain differences on growth, body

76 composition and metabolic characteristics compared with modern breeds. The  
77 objective of the present study was to evaluate differences on insulin sensitivity  
78 between Iberian and Landrace pigs using an intra-arterial glucose tolerance test  
79 (IAGTT).

80

## 81 **Material and methods**

### 82 *Animals*

83 All procedures used in this study were approved by the Bioethical Committee of  
84 the Spanish National Research Council (CSIC, Spain), and the animals were  
85 cared for in accordance with the Royal Decree No. 1201/2005 (Spain). The  
86 experiment was performed with five Landrace and four Iberian (*Silvela* strain)  
87 barrows supplied by Granja El Arenal (Córdoba, Spain) and Sánchez Romero  
88 Carvajal (Jabugo S.A., Puerto de Santa María, Cádiz, Spain), respectively. The  
89 pigs were allowed *ad libitum* access to a standard diet (160 g CP/kg; 14 MJ  
90 metabolizable energy/kg DM) with free access to water in a controlled-  
91 environment room ( $21 \pm 1.5^{\circ}\text{C}$ ). After acclimatization, each animal was  
92 surgically fitted with a chronic catheter in carotid artery following the procedure  
93 described previously (Rodríguez-López *et al.*, 2013). After surgery, the pigs  
94 were fed at  $2.4 \times$  metabolizable energy for maintenance ( $444 \text{ kJ/kg}^{0.75} \text{ BW}$ ;  
95 National Research Council (NRC) 1998) with the same standard diet. On the  
96 day of the experiment, pigs ( $46.0 \pm 3.0$  and  $47.8 \pm 3.6 \text{ kg BW}$ , Iberian and  
97 Landrace, respectively, that is about 18 weeks and 14 weeks, respectively)  
98 were given an intra-arterial bolus ( $500 \text{ mg/kg BW}$ ) of glucose (50% sterile  
99 dextrose; glucosado 50% Braun, B. Braun Medical S.A., Rubi, Barcelona,  
100 Spain) over one min period after an overnight fast. The catheter was

101 immediately flushed with 5 mL of sterile saline solution. Blood samples (5 mL)  
102 were collected at -10, 0 (20-30 seconds after the bolus of glucose and the  
103 saline solution), 5, 10, 15, 20, 25, 30, 45, 60, 90, 120 and 180 min following  
104 glucose infusion.

105

#### 106 *Biochemical analysis and calculations*

107 Plasma was obtained by centrifugation (4°C, 1820 x g for 30 min; Eppendorf  
108 5810 R, Hamburg, Germany) and stored in aliquots at -20°C until insulin and  
109 metabolites (glucose, lactate, triglycerides, cholesterol, creatinine, albumin and  
110 urea) were analysed. All samples were assayed in duplicate except for insulin  
111 which was assayed in triplicate.

112 Insulin was measured using commercially-available radioimmuno assay kit  
113 following the directions of the manufacturer (Millipore porcine insulin  
114 radioimmuno assay kit; Cat. PI-12K). Radioactivity in samples was measured  
115 using a gamma counter (Behring 1612; Nuclear Enterprises Ltd, Edinburgh,  
116 Scotland). Human insulin was used as standard, and the assay was validated  
117 for use in porcine plasma samples (Fernández-Fígares *et al.*, 2007). The intra-  
118 and inter-assay CVs for plasma insulin were 4.4 and 9.1%, respectively.

119 Plasma glucose, lactate, triglycerides, cholesterol, creatinine, albumin and  
120 urea were measured colorimetrically using an automated Cobas Integra 400®  
121 analyser (Roche Diagnostics GmbH, Mannheim, Germany).

122 Responses of plasma insulin, glucose and lactate were evaluated separately  
123 by computing total area under the response curve (AUC) determined using  
124 trapezoidal geometry ([GraphPad Prism, Version 5.02. San Diego, CA](#)) for the  
125 time period indicated following intra-arterial glucose infusion (e.g. AUC0-5

126 stands for the integrated area between 0-5 min post-infusion, AUC0-10 between  
127 0-10 min post-infusion, and so on, until AUC0-180). **Basal levels per breed** (at  
128 time -10 min) were used to calculate the corresponding AUC per metabolite.  
129 The rates of decline in plasma insulin and glucose concentrations for both  
130 breeds were calculated based on the slope in the linear portion of the response  
131 curve from 0 to 30 min after IAGTT challenge (Christoffersen *et al.*, 2009).  
132 Results were then expressed as a fractional rate constant determined from the  
133 slope of the natural logarithm of plasma concentrations vs. time (Shipley and  
134 Clark, 1972; cited by (Gopinath and Etherton, 1989). The fractional turnover  
135 rates ( $k$ ), or disappearance rates, of plasma insulin and glucose (%/min) were  
136 calculated using the relationship (Kaneko *et al.*, 2008):

$$137 \quad k = (\ln 1 - \ln 2) / (T_2 - T_1)$$

138 where  $\ln 1$  and  $\ln 2$  are the natural logarithms of plasma insulin concentration,  
139 ( $\mu\text{U/mL}$ , (or glucose concentration,  $\text{mM}$ ) concentrations at times  $T_1$  (0 min) and  
140  $T_2$  (30 min), respectively.

141 From the  $k$  value, the half-life,  $T_{1/2}$  (min), may be calculated as:

$$142 \quad T_{1/2} = 100 \times 0.693 / k$$

143 For insulin sensitivity, indices used in human medicine were used.

144 The so-called homeostasis model assessment (HOMA; Matthews *et al.*,  
145 1985) was calculated for estimating insulin resistance (HOMA-IR) and  $\beta$ -cell  
146 function (HOMA-%B) at fasting conditions, as follows:

$$147 \quad \text{HOMA-IR: fasting plasma insulin } (\mu\text{U/mL}) \times \text{fasting plasma glucose } (\text{mM}) / 22.5$$

$$148 \quad \text{HOMA-\%B: } (20 \times \text{fasting plasma insulin } (\mu\text{U/mL})) / (\text{fasting plasma glucose } (\text{mM}) \\ 149 \quad - 3.5)$$

150 It is assumed that non-insulin-resistant individuals have 100%  $\beta$ -cell function  
151 and an insulin resistance of 1.

152 The quantitative insulin sensitivity check index (QUICKI; Katz *et al.*, 2000)  
153 was computed as:

$$154 \quad 1/[\text{Ln}(I_0) + \text{Ln}(G_0)]$$

155 where  $I_0$  is the fasting insulin ( $\mu\text{U}/\text{mL}$ ), and  $G_0$  is the fasting glucose ( $\text{mg}/\text{dl}$ ).

156 Finally, the insulin sensitivity index (CSI; Tura *et al.*, 2010) was calculated as:

$$157 \quad \text{CSI} = K_G/(\Delta\text{AUC}_{\text{INS}}/T)$$

158 where  $K_G$  is the slope of Ln glucose in the linear portion of the response curve,  
159  $\Delta\text{AUC}_{\text{INS}}$  is the AUC of insulin above basal value, and T is the time interval  
160 (between 0 and 30 min) when  $K_G$  and  $\Delta\text{AUC}_{\text{INS}}$  are calculated.

161

## 162 *Statistical analyses*

163 The number of animals was calculated using the G\*Power software (Heinrich-  
164 Heine-Universität Düsseldorf; (Faul *et al.*, 2007). Accepting an alpha risk of 0.05  
165 and a beta risk of 0.2 in a two-sided test, 5 subjects are necessary in first group  
166 and 5 in the second to recognize as statistically significant a difference greater  
167 than or equal to 12  $\mu\text{U}/\text{ml}$  on insulin concentration and a common standard  
168 deviation of 6.3  $\mu\text{U}/\text{ml}$  based on previous studies (Fernández-Fígares *et al.*,  
169 2007). A total of 5 pigs per treatment was also used by others (e.g. Stoll *et al.*,  
170 1999). However, one Iberian pig lost the arterial catheter during the recovery  
171 period after surgery and only four Iberian pigs could be used.

172 Plasma metabolites were evaluated using a mixed ANOVA with repeated  
173 measures (Version 9.4; PROC MIXED, SAS Institute Inc., Cary, NC, USA) with  
174 the fixed effects of breed, time of sampling and their interaction in the model

175 statement. The pig was considered a random effect. **First-order ante**  
176 **dependence covariance ANTE(1) was used, which allows unequal variances**  
177 **over time and unequal correlations and covariance among different pairs of**  
178 **measurements.** Plasma concentration differences between breeds at each  
179 sampling time were analysed by the pdiff (piecewise differentiable) option.  
180 Assumptions that are required for an ANOVA were tested following the protocol  
181 from Zuur *et al.* (2010). Homogeneity of variance was assured by applying the  
182 Levene's-Test. No transformation was required. Least square means and  
183 pooled SEM are presented. Differences were considered significant at  $P < 0.05$   
184 and trends approaching significance were considered for  $0.05 < P < 0.10$ .

185

## 186 **Results**

187 Fasting plasma insulin was greater in Iberian compared with Landrace pigs  
188 (15.6 and 8.10  $\mu\text{U/mL}$ , respectively;  $\text{sem}=1.55$ ,  $P < 0.05$ ) whereas fasting  
189 plasma glucose was similar for both breeds (4.68 and 5.85  $\text{mmol/L}$  for Iberian  
190 and Landrace pigs, respectively;  $\text{sem}=0.92$ ,  $P > 0.10$ ). **No differences between**  
191 **breeds were found in fasting plasma albumin (Iberian 0.50 and Landrace 0.54**  
192  **$\mu\text{M}$ ), urea (Iberian 3.3 and Landrace 3.0  $\text{mM}$ ), cholesterol (Iberian 1.46 and**  
193 **Landrace 1.79  $\text{mM}$ ) and triglycerides (Iberian 0.28 and Landrace 0.22  $\text{mM}$ ). On**  
194 **the other hand plasma fasting creatinine was lower in Iberian compared to**  
195 **Landrace (54 and 102  $\mu\text{M}$ , respectively;  $P < 0.01$ ).**

196 Average plasma metabolites and insulin concentrations after the IAGTT are  
197 shown in Table 1. Mean plasma glucose, cholesterol and creatinine  
198 concentrations were lower in Iberian (14, 22 and 68%, respectively;  $P < 0.05$ )  
199 compared with Landrace pigs. However, mean plasma insulin, lactate,



200 triglycerides and urea concentrations were greater in Iberian (50, 35, 18 and  
201 23%, respectively;  $0.01 < P < 0.001$ ) than in Landrace pigs. No differences ( $P >$   
202 0.1) were found between breeds for albumin levels.

203 Only plasma insulin (Figure 1), glucose (Figure 2) and lactate (Figure 3)  
204 concentrations changed throughout time ( $P < 0.001$ ; Table1) after the IAGTT.

205 An interaction between breed and time was found for plasma insulin, such  
206 that concentration of insulin was greater in Iberian pigs from -10 to 15 min and  
207 from 90-180 min ( $P < 0.05$ , with  $P < 0.1$  at times 0 and 90 min) and lower at 25  
208 min ( $P < 0.1$ ; Figure 1). In both breeds, plasma insulin levels increased 7-fold,  
209 reaching a peak concentration 10 and 15 min after glucose infusion for Iberian  
210 ( $113.6 \pm 7.1 \mu\text{U/mL}$ ) and Landrace ( $55.7 \pm 6.4 \mu\text{U/mL}$ ) pigs, respectively. Insulin  
211 remained well above fasting levels until 20 and 45 min after glucose infusion for  
212 Iberian and Landrace pigs, respectively; thereafter insulin levels rapidly  
213 decreased until fasting levels were attained. Fractional turnover rate tended to  
214 increase in Iberian compared with Landrace pigs ( $6.2$  and  $4.7 \pm 0.46\%/min$ ,  
215 respectively;  $0.05 < P < 0.1$ ) while half-life tended to decrease ( $11.3$  and  $15.2 \pm$   
216  $1.30$  min for Iberian and Landrace pigs, respectively;  $0.05 < P < 0.1$ ).

217 Glucose peaked (Figure 2) immediately after glucose infusion reaching a  
218 value of 19.6 mmol/L and 21.2 mmol/L for Iberian and Landrace pigs,  
219 respectively. Subsequently, glucose concentration gradually decreased to  
220 values below fasting levels after 25 min and 30 min, respectively for Iberian and  
221 Landrace pigs. The lowest plasma glucose concentration (glucose nadir) was  
222 found at 45 min (2.95 mmol/L and 3.70 mmol/L for Iberian and Landrace pigs,  
223 respectively). After glucose nadir, glucose concentration gradually increased  
224 again to reach values comparable to fasting levels at 180 min. No differences

225 were found between breeds for glucose fractional turnover rate ( $4.1$  and  $3.3 \pm$   
226  $0.37\%/min$  for Iberian and Landrace pigs, respectively;  $P > 0.10$ ) or glucose  
227 half-life ( $17.1$  and  $22.1 \pm 2.67$  min for Iberian and Landrace pigs, respectively;  $P$   
228  $> 0.10$ ).

229 Lactate increased after the IAGTT, peaked at 20 min for both breeds and  
230 declined progressively until reaching basal concentrations at 180 min (Figure 3).

231 The AUC values for each sampling time of insulin, glucose and lactate are  
232 shown in Figure 4, 5 and 6, respectively. Insulin AUC was greater ( $P < 0.05$ ) for  
233 Iberian compared with Landrace pigs at all times. Conversely, glucose AUC  
234 between 0-15, 0-20, 0-25, 0-30, 0-45 and 0-60 min were lower ( $P < 0.05$ ) for  
235 Iberian than Landrace pigs. Glucose AUC tended to be lower ( $0.05 < P < 0.10$ )  
236 between 0-10, 0-90 and 0-120 min. No differences ( $P < 0.05$ ) in glucose AUC  
237 was found between 0-5, 0-150 and 0-180 min. Plasma lactate AUC was greater  
238 ( $P < 0.05$ ) for Iberian pigs for 0-10 and 0-15 min and tended to be greater ( $0.05$   
239  $< P < 0.10$ ) for 0-5, 0-20, 0-25, 0-90, 0-120, 0-150 and 0-180 min after glucose  
240 infusion.

241 Indices of insulin sensitivity are shown in Table 2. The QUICKI index  
242 decreased ( $P < 0.05$ ) while HOMA-%B index increased ( $P < 0.01$ ) in Iberian  
243 compared with Landrace pigs. No differences ( $P > 0.10$ ) were found for HOMA-  
244 IR and CSI.

245

## 246 Discussion

247 The IAGTT method allowed the comparison of the insulin responsiveness of an  
248 obese (Iberian) and a lean (Landrace) pig breed. It has previously been shown  
249 that Iberian pigs are fatty pigs with slow growth rate compared to modern

250 breeds (Nieto *et al.*, 2012). As arterial blood represents the metabolites  
251 concentration to which the tissues are exposed (Brouns *et al.*, 2005), chronic  
252 catheters were inserted in carotid artery for glucose infusion and blood  
253 sampling.

254 In the current study we have shown increased fasting plasma insulin and  
255 insulin response (higher plasma concentrations and AUC) after glucose infusion  
256 in Iberian compared with Landrace pigs (18 and 14 weeks of age, respectively).  
257 Greater postprandial serum levels of insulin have been described in 20 kg  
258 Iberian (11 weeks of age) compared to Landrace after glucose infusion  
259 (Fernández-Figares *et al.*, 2007), and in 11kg Ossabaw (obese; 10 weeks of  
260 age) compared to 16.5 kg Yorkshire (10 weeks of age) pigs (Wangness *et al.*,  
261 1981). However, other comparative studies using a standard diet found  
262 increased insulin secretion in 75-120 kg Large White boars than in 40-75 kg  
263 Meishan boars (obese breed) at 20 and 52 weeks of age, respectively (Weiler  
264 *et al.*, 1998). The limited growth and development of slow growing pigs could  
265 result at least partly from disturbances in insulin secretion and/or in insulin  
266 binding, leading to insulin sensitivity, because most cells of the body require  
267 insulin for adequate uptake of glucose and amino acids (Claus and Weiler,  
268 1994). If the concentration of insulin is compared among animals of different  
269 breeds, the sensitivity of each breed to insulin should be considered. In this  
270 study we were also interested in other key metabolites which could provide  
271 additional information concerning insulin sensitivity in Iberian pigs.

272 After glucose infusion, glucose plasma concentration rapidly returns to  
273 preprandial values as shown in the present experiment, which indicates that  
274 exogenous glucose was efficiently metabolized, stored as glycogen, or both. As

275 expected, when glucose was infused, plasma glucose levels were rapidly  
276 increased and a subsequent insulin response was observed. The elevated  
277 insulin lowered plasma glucose below fasting values **within 20 and 25 min for**  
278 **Iberian and Landrace pigs**, respectively, and insulin levels returned to baseline  
279 as plasma glucose declined. In our study, glucose concentration and glucose  
280 AUC during the IAGTT were lower in Iberian compared with Landrace pigs, with  
281 no differences in fasting plasma glucose, maybe due to the limited number of  
282 pigs. When interpreting the individual glucose curves, a monophasic pattern  
283 was identified for both breeds. The lower glucose AUC of Iberian pigs (-19% on  
284 average) may be related to the greater insulin AUC (+33% on average), a  
285 common pattern in many models of obesity (*Kay et al., 2001*). However, the  
286 reasons for the unequal physiological response between breeds are not well  
287 understood and must be discussed.

288 As it has been proved that the energy needs of portal-drained viscera are  
289 fulfilled by the oxidation of glucose, glutamate, and glutamine in pigs (*Stoll et*  
290 *al., 1999*), a larger gastrointestinal tract of Iberian pigs compared to Landrace  
291 (*Rivera-Ferre et al., 2005*) is in line with the decreased AUC of glucose reported  
292 in our experiment.

293 However, despite the larger size of the gastrointestinal tract and lower portal  
294 blood flow (*González-Valero et al., 2016*) of Iberian compared with Landrace  
295 pigs, no differences on net portal flux of glucose after ingestion of the same diet  
296 were found (*Rodríguez-López et al., 2013*). Differences on insulin stimulated  
297 glucose transport at portal-drained viscera level may help to explain these  
298 results. Iberian have lower glucose concentrations than Landrace pigs after an  
299 intravenous adrenaline challenge (*Fernández-Fígares et al., 2016*), suggesting

300 a decreased response of Iberian pigs to sympathetic nervous system stimuli  
301 which is in line with the lower glucose AUC reported here.

302 Lactate appearance after an intravenous glucose test is positively associated  
303 with insulin sensitivity in humans (Lovejoy *et al.*, 1992), as it is related to lactate  
304 production by insulin sensitive tissues (mainly muscle and fat). Because only  
305 limited amounts of lactate are produced by muscle after glucose loading  
306 (Ykijarvinen *et al.*, 1990), the source of lactate appearance should  
307 predominantly be adipose tissue (Lovejoy *et al.*, 1992), with a large capacity to  
308 convert glucose to lactate (Marin *et al.*, 1987). We report here a delay of 20 min  
309 in plasma lactate elevation relative to glucose peak following IAGTT, which may  
310 reflect the time lag in adipose tissue uptake of glucose and subsequent lactate  
311 production under the stimulation of insulin. Compared with Landrace, the  
312 increased lactate AUC in Iberian pigs after the IAGTT could therefore be a  
313 consequence of a larger adipose tissue (Nieto *et al.*, 2002) instead of greater  
314 insulin sensitivity. On the other hand, insulin resistance was associated with  
315 elevated basal lactate levels in obese humans (Lovejoy *et al.*, 1990), so  
316 increased basal lactate concentrations in Iberian pigs (1.040 vs. 0.730 mmol/L;  
317 sem=0.063) could also indicate insulin resistance or reduced insulin sensitivity.  
318 Although inhibition of insulin action on glycogenolysis in fasting conditions may  
319 lead to increased glucose release from glycogen and subsequent conversion of  
320 glucose to lactate, there is no direct evidence of this. There is indirect evidence,  
321 though, that elevated lactate levels reflect a glucose sparing effect (decreased  
322 glucose utilisation) in muscle (Pearce and Connett, 1980).

323 Obesity is frequently associated with different degrees of dyslipidemia  
324 manifested as increased triglyceridemia and low HDL-cholesterol. In our

325 experiment, we found lower plasma cholesterol but greater plasma triglycerides  
326 concentration in Iberian compared with Landrace pigs, although we did not  
327 separate LDL and HDL fractions. Reduced total cholesterol concentration could  
328 be due to reduced hepatic insulin sensitivity as insulin stimulates cholesterol  
329 synthesis (Nelson and Cox, 2017). **In any case the cholesterolemia for both**  
330 **breeds in the present experiment was in the lower range of published values**  
331 **(Fernández-Fígares *et al.*, 2007) and it cannot be considered that Landrace**  
332 **pigs were hypercholesterolemic.**

333 Previous studies in our lab have shown the low genetic potential of growing  
334 Iberian pigs for muscle protein deposition in comparison to lean breeds (Nieto *et*  
335 *al.*, 2002), possibly due to the greater muscle protein degradation and turnover  
336 of the former (Rivera-Ferre *et al.*, 2005). In line with this, plasma urea level (an  
337 indirect protein degradation indicator) was in the present study 23% greater in  
338 Iberian compared with Landrace pigs. Differences on circulating insulin or the  
339 capacity of insulin release between breeds may explain differences in lean  
340 tissue deposition, as insulin has an important role in skeletal muscle metabolism  
341 (Wang *et al.*, 2006). In obese db/db mice (a model of insulin deficiency) higher  
342 muscle protein degradation in comparison with control mice (normal plasma  
343 insulin concentration) was reported; the authors concluded that insulin  
344 resistance was associated with accelerated muscle protein degradation (Wang  
345 *et al.*, 2006). The elevated protein degradation reported in Iberian compared  
346 with Landrace pigs (Rivera-Ferre *et al.*, 2005) suggests the possibility of insulin  
347 resistance at this level. The lower plasma creatinine level (indicator of muscle  
348 mass) found in this study for Iberian pigs, is in accordance with previous studies  
349 (Fernández-Fígares *et al.*, 2007) and also with the low muscle protein

350 deposition and muscle size described previously (Nieto *et al.*, 2002; Rivera-  
351 Ferre *et al.*, 2005). As insulin resistance is associated with decreased muscle  
352 mass, plasma creatinine levels can also be used as an indicator of insulin  
353 signalling disorders as reported by Kashima *et al.* (2017) in humans. Further  
354 research regarding amino acid concentration after an IAGTT may help to  
355 explain differences in the effect of insulin on muscle protein metabolism  
356 between breeds.

357 When insulin sensitivity indices used in human medicine were applied to the  
358 conditions of the present experiment, QUICKI and HOMA-%B were more  
359 sensitive detecting differences between breeds. Indeed, QUICKI index  
360 decreased in Iberian compared with Landrace pigs, pointing out an incipient  
361 insulin sensitivity impairment in fasting Iberian pigs. Similarly, reduced QUICKI  
362 index (0.5 vs. 0.6) was found in Bama miniature pigs fed a high sucrose high fat  
363 diet compared with a control diet, respectively (Liu *et al.*, 2017). The QUICKI  
364 index has been shown to provide reasonable approximations of insulin  
365 efficiency in minipigs (Christoffersen *et al.*, 2009).

366 When we used the homeostasis model assessment (HOMA), differences on  
367 hepatic insulin resistance (HOMA-IR index) were negligible between breeds  
368 (3.3 and 2.3 for Iberian and Landrace, respectively;  $P>0.10$ ). However, Iberian  
369 had improved  $\beta$ -cell function compared with Landrace pigs according to HOMA-  
370 %B index (267 and 100 for Iberian and Landrace, respectively;  $P<0.01$ ), which  
371 may be due to enhanced sensitivity of the  $\beta$ -cells to glucose during the fasting  
372 period. As a consequence,  $\beta$ -cell insulin synthesis in Iberian pigs increased in  
373 accordance with the increased insulin release after the glucose tolerance test  
374 and the elevated basal insulin concentrations reported for Iberian pigs. This is

375 consistent with decreased quantitative insulin sensitivity check index in Iberian  
376 pigs compared to Landrace (0.31 and 0.33 for Iberian and Landrace,  
377 respectively;  $P < 0.05$ ).

378 Previous studies from our lab indicate that growing Iberian pigs are prone to  
379 insulin resistance compared with modern breeds as denoted by increased  
380 hepatic gluconeogenesis (González-Valero *et al.*, 2014), greater plasma free  
381 fatty acid concentration (Fernández-Fígares *et al.*, 2016) and lower plasma  
382 creatinine and QUICKI index (Fernández-Fígares *et al.*, 2007). Additionally, in  
383 this experiment we show greater HOMA-%B and increased plasma insulin and  
384 lactate concentrations after an IAGTT. The increased plasma insulin AUC after  
385 an IAGTT suggests insulin resistance in comparison to values obtained for lean  
386 pigs, although the concentration of glucose remained low which could indicate  
387 the absence of a peripheral insulin resistance. **Although Iberian pigs may be**  
388 **considered an obese breed in terms of body composition (Nieto *et al.*, 2002;**  
389 **Barea *et al.*, 2007), insulin resistance mechanisms have not yet been fully**  
390 **established at the development stage of the pigs in this experiment.** Insulin  
391 resistance and impaired glucose tolerance has been shown in Iberian sows (2.5  
392 years old) *ad libitum* fed a saturated fat enriched diet for three months (Torres-  
393 Rovira *et al.*, 2012). Although our results support the existence of an insulin  
394 resistance or a decreased insulin sensitivity in growing Iberian pigs, **caution**  
395 **should be taken because of the reduced number of pigs used.** The utilization of  
396 the hyperinsulinemic euglycemic clamp, the most definitive approach to  
397 determine whole-body insulin action should provide conclusive evidence  
398 regarding the establishment of insulin resistance in growing Iberian pigs.

399



## 400 **Acknowledgements**

401 The authors thank the company Sánchez Romero Carvajal (Jabugo S.A.,  
402 Puerto de Santa María, Spain) for their helpful collaboration, Dr Luis Lara for  
403 statistical advice and Dr Thomas J. Caperna for critically reading the  
404 manuscript. This research was supported by grant AGL2006-5937 from the  
405 Ministry of Science and Education of Spain.

406

## 407 **Declaration of interest**

408 There are no conflicts of interest.

409

## 410 **Ethics statement**

411 The procedures used in this study were approved by the Bioethical Committee  
412 of the Spanish National Research Council (CSIC, Spain), and the animals were  
413 cared for in accordance with the Royal Decree No. 1201/2005 (Spain).

414

## 415 **Software and data repository resources**

416 Data and models are not deposited in an official repository.

417

## 418 **References**

419

420 Barea R, Nieto R and Aguilera JF 2007. Effects of the dietary protein content  
421 and the feeding level on protein and energy metabolism in Iberian pigs growing  
422 from 50 to 100 kg body weight. *Animal* 1, 357-365.

423 Brouns F, Bjorck I, Frayn KN, Gibbs AL, Lang V, Slama G and Wolever TMS  
424 2005. Glycaemic index methodology. *Nutrition research reviews* 18, 145-171.

425 Christoffersen B, Ribel U, Raun K, Golozoubova V and Pacini G 2009.  
426 Evaluation of different methods for assessment of insulin sensitivity in Gottingen  
427 minipigs: introduction of a new, simpler method. *American Journal of*  
428 *Physiology-Regulatory Integrative and Comparative Physiology* 297, R1195-  
429 R1201.

430 Claus R and Weiler U 1994. Endocrine regulation of growth and metabolism in  
431 the pig - a review. *Livestock Production Science* 37, 245-260.

432 Faul, F., E. Erdfelder, A.-G. Lang, and A. Buchner. 2007. G\*Power 3: A flexible  
433 statistical power analysis program for the social, behavioral, and biomedical  
434 sciences. *Behavior Research Methods* 39: 175-191.

435 Fernández-Fígares I, Lachica M, Nieto R, Rivera-Ferre MG and Aguilera JF  
436 2007. Serum profile of metabolites and hormones in obese (Iberian) and lean  
437 (Landrace) growing gilts fed balanced or lysine deficient diets. *Livestock*  
438 *Science* 110, 73-81.

439 Fernández-Fígares I, Rodríguez-López JM, González-Valero L and Lachica M  
440 2016. Metabolic responses to adrenaline challenge in Iberian compared to  
441 Landrace pigs. In 9th International Symposium on Mediterranean Pig,  
442 Portalegre, Portugal, p. 67.

443 González-Valero L, Rodríguez-López JM, Lachica M and Fernández-Fígares I  
444 2014. Metabolic differences in hepatocytes of obese and lean pigs. *Animal* 8,  
445 1873-1880.

446 González-Valero L, Rodríguez-López JM, Lachica M and Fernández-Fígares I  
447 2016. Contribution of portal-drained viscera to heat production in Iberian gilts  
448 fed a low protein diet: comparison to Landrace. *Journal of the Science of Food*  
449 *and Agriculture* 96, 1202-1208.

450 Gopinath, R., and T. D. Etherton. 1989. Effects of porcine growth-hormone on  
451 glucose-metabolism of pigs .2. Glucose-tolerance, peripheral tissue insulin  
452 sensitivity and glucose kinetics. *Journal of Animal Science* 67: 689-697.

453 Kaneko JJ. Carbohydrate metabolism and its diseases. In: , 6th ed.; Kaneko JJ,  
454 Harvey JW and Bruss ML Eds.; Academic Press, London, UK, 2008; pp. 45-80.

455 Kashima S, Inoue K, Matsumoto M and Akimoto K 2017. Low serum creatinine  
456 is a type 2 diabetes risk factor in men and women: The Yuport Health Checkup  
457 Center cohort study. *Diabetes and Metabolism* 43, 460-464.

458 Katz A, Nambi S, Mather K, Baron A, Follmann D, Sullivan G and Quon M  
459 2000. Quantitative Insulin Sensitivity Check Index: A Simple, Accurate Method  
460 for Assessing Insulin Sensitivity In Humans. *The Journal of clinical  
461 endocrinology and metabolism* 85, 2402-2410.

462 Kay JP, Alemzadeh R, Langley G, D'Angelo L, Smith P and Holshouser S.  
463 2001. Beneficial effects of metformin in normoglycemic morbidly obese  
464 adolescents. *Metabolism-Clinical and Experimental* 50: 1457-1461.

465 Liu YQ, Yuan JF, Xiang L, Zhao YQ, Niu MM, Dai X and Chen H 2017. A high  
466 sucrose and high fat diet induced the development of insulin resistance in the  
467 skeletal muscle of Bama miniature pigs through the Akt/GLUT4 pathway.  
468 *Experimental Animals* 66, 387-395.

469 Lovejoy J, Mellen B and Digirolamo M 1990. Lactate generation following  
470 glucose-ingestion - relation to obesity, carbohydrate-tolerance and insulin  
471 sensitivity. *International Journal of Obesity* 14, 843-855.

472 Lovejoy J, Newby FD, Gebhart SSP and Digirolamo M 1992. Insulin resistance  
473 in obesity is associated with elevated basal lactate levels and diminished lactate

474 appearance following intravenous glucose and insulin. *Metabolism-Clinical and*  
475 *Experimental* 41, 22-27.

476 Marin P, Rebuffescrive M, Smith U and Bjorntorp P 1987. Glucose-uptake in  
477 human adipose-tissue. *Metabolism-Clinical and Experimental* 36, 1154-1160.

478 Matthews DR, Hosker JP, Rudenski AS, Naylor BA, Treacher DF and Turner  
479 RC 1985. Homeostasis model assessment - insulin resistance and beta-cell  
480 function from fasting plasma-glucose and insulin concentrations in man.  
481 *Diabetologia* 28, 412-419.

482 Nelson DL and Cox MM 2017. Cholesterol, Steroids, and Isoprenoids:  
483 Biosynthesis, Regulation, and Transport. In *Lehninger principles of*  
484 *biochemistry*. 7<sup>th</sup> ed.; W.H. Freeman; New York, NY; pp.816-832.

485 National Research Council (NRC) 1998. Nutrient requirements of swine,10th  
486 edition. National Academy Press, Washington, DC.

487 Nieto R, Lara L, Barea R, Garcia-Valverde R, Aguinaga MA, Conde-Aguilera JA  
488 and Aguilera JF 2012. Response analysis of the Iberian pig growing from birth  
489 to 150 kg body weight to changes in protein and energy supply. *Journal of*  
490 *Animal Science* 90, 3809-3820.

491 Nieto R, Miranda A, Garcia MA and Aguilera JF 2002. The effect of dietary  
492 protein content and feeding level on the rate of protein deposition and energy  
493 utilization in growing Iberian pigs from 15 to 50 kg body weight. *British Journal*  
494 *of Nutrition* 88, 39-49.

495 Pearce FJ and Connett RJ 1980. Effect of lactate and palmitate on substrate  
496 utilization of isolated rat soleus. *American Journal of Physiology* 238, C149-  
497 C159.

498 Rivera-Ferre MG, Aguilera JF and Nieto R 2005. Muscle fractional protein  
499 synthesis is higher in Iberian than in landrace growing pigs fed adequate or  
500 lysine-deficient diets. *Journal of Nutrition* 135, 469-478.

501 Rodríguez-López JM, Lachica M, González-Valero L and Fernández-Fígares I  
502 2013. Approaches for quantifying gastrointestinal nutrient absorption and  
503 metabolism in a native and a modern pig breed. *Journal of Agricultural Science*  
504 151, 434-443.

505 Shipley RA and Clark RE 1972. Tracer methods for In vivo kinetics. Theory and  
506 applications. Academic Press, New York.

507 Stoll B, Burrin DG, Henry J, Yu H, Jahoor F and Reeds PJ 1999. Substrate  
508 oxidation by the portal drained viscera of fed piglets. *American Journal of*  
509 *Physiology-Endocrinology and Metabolism* 277, E168-E175.

510 Torres-Rovira L, Astiz S, Caro A, Lopez-Bote C, Ovilo C, Pallares P, Perez-  
511 Solana ML, Sanchez-Sanchez R and Gonzalez-Bulnes A 2012. Diet-Induced  
512 Swine Model with Obesity/Leptin Resistance for the Study of Metabolic  
513 Syndrome and Type 2 Diabetes. *Scientific World Journal* 2012:510149.

514 Torres-Rovira L, Pallares P, Vigo E, Gonzalez-Anover P, Sanchez-Sanchez R,  
515 Mallo F and Gonzalez-Bulnes A . 2011. Plasma Leptin, Ghrelin and Indexes of  
516 Glucose and Lipid Metabolism in Relation to the Appearance of Post-Weaning  
517 Oestrus in Mediterranean Obese Sows (Iberian Pig). *Reproduction in Domestic*  
518 *Animals* 46: 558-560.

519 Tura A, Sbrignadello S, Succurro E, Groop L, Sesti G and Pacini G 2010. An  
520 empirical index of insulin sensitivity from short IVGTT: validation against the  
521 minimal model and glucose clamp indices in patients with different clinical  
522 characteristics. *Diabetologia* 53, 144-152.

523 Wang X, Hu Z, Hu J, Du J and Mitch W 2006. Insulin Resistance Accelerates  
524 Muscle Protein Degradation: Activation of the Ubiquitin-Proteasome Pathway by  
525 Defects in Muscle Cell Signaling. *Endocrinology* 147, 4160-4168.

526 Wangsness PJ, Acker WA, Burdette JH, Krabill LF and Vasilatos R 1981. Effect  
527 of fasting on hormones and metabolites in plasma of fast-growing, lean and  
528 slow-growing obese pigs. *Journal of Animal Science* 52, 69-74.

529 Weiler U, Claus R, Schnoebelen Combes S and Louveau I 1998. Influence of  
530 age and genotype on endocrine parameters and growth performance: a  
531 comparative study in Wild boars, Meishan and Large White boars. *Livestock  
532 Production Science* 54, 21-31.

533 Ykijarvinen H, Bogardus C and Foley JE 1990. Regulation of plasma lactate  
534 concentration in resting human-subjects. *Metabolism-Clinical and Experimental*  
535 39, 859-864.

536 Zuur AF, Ieno EN and Elphick CS 2010. A protocol for data exploration to avoid  
537 common statistical problems. *Methods in Ecology and Evolution* 1, 3-14.

538

539

**Table 1** Average plasma metabolites and insulin concentrations in Iberian ( $n = 4$ ) and Landrace ( $n = 5$ ) pigs during an intra-arterial glucose tolerance test (500 mg/kg BW, 0-180 min)

|                        | Breed   |          | SEM   | P-value <sup>1</sup> |       |              |
|------------------------|---------|----------|-------|----------------------|-------|--------------|
|                        | Iberian | Landrace |       | Breed                | Time  | Breed × Time |
| Insulin (μU/mL)        | 41      | 27       | 1.9   | ***                  | ***   | ***          |
| Glucose (mmol/L)       | 6.8     | 7.7      | 0.26  | **                   | ***   | 0.257        |
| Lactate (mmol/L)       | 1.3     | 1.0      | 0.039 | ***                  | ***   | 0.989        |
| Triglycerides (mmol/L) | 0.28    | 0.24     | 0.009 | **                   | 0.474 | 0.954        |
| Cholesterol (mmol/L)   | 1.5     | 1.8      | 0.033 | ***                  | 0.934 | 0.999        |
| Creatinine (μmol/L)    | 54      | 90       | 1.2   | **                   | 0.722 | 0.955        |
| Albumin (mmol/L)       | 0.48    | 0.50     | 0.009 | 0.131                | 0.992 | 0.999        |
| Urea (mmol/L)          | 3.0     | 2.4      | 0.102 | ***                  | 0.779 | 0.999        |

<sup>1</sup>ns = non-significant; \*\* $P < 0.01$ ; \*\*\* $P < 0.001$ .

540

541

542

543

544

**Table 2** *Indices of glucose tolerance and insulin sensitivity in Iberian (n = 4) and Landrace (n = 5) pigs subjected to an intra-arterial glucose tolerance test (500 mg/kg BW)<sup>1</sup>*

|                          | Iberian | Landrace | SEM   | P-value <sup>2</sup> |
|--------------------------|---------|----------|-------|----------------------|
| QUICKI                   | 0.31    | 0.33     | 0.007 | *                    |
| HOMA-IR                  | 3.3     | 2.3      | 0.58  | 0.205                |
| HOMA-%B                  | 267     | 100      | 25.6  | **                   |
| CSI ( $\times 10^{-4}$ ) | -12     | -13      | 1.8   | 0.845                |

<sup>1</sup>QUICKI: quantitative insulin sensitivity check index; HOMA-IR: homeostasis model assessment for estimating insulin resistance; HOMA-%B: homeostasis model assessment for estimating  $\beta$ -cell function; CSI: calculated insulin sensitivity index.

<sup>2</sup>ns = non-significant; \* $P < 0.05$ ; \*\* $P < 0.01$ .

545

546

547



548

549 **Figure 1** Plasma insulin concentrations before and after intra-arterial glucose

550 tolerance test (500 mg/kg BW) in growing Iberian (n = 4) and Landrace (n = 5)

551 pigs<sup>1,2</sup>.

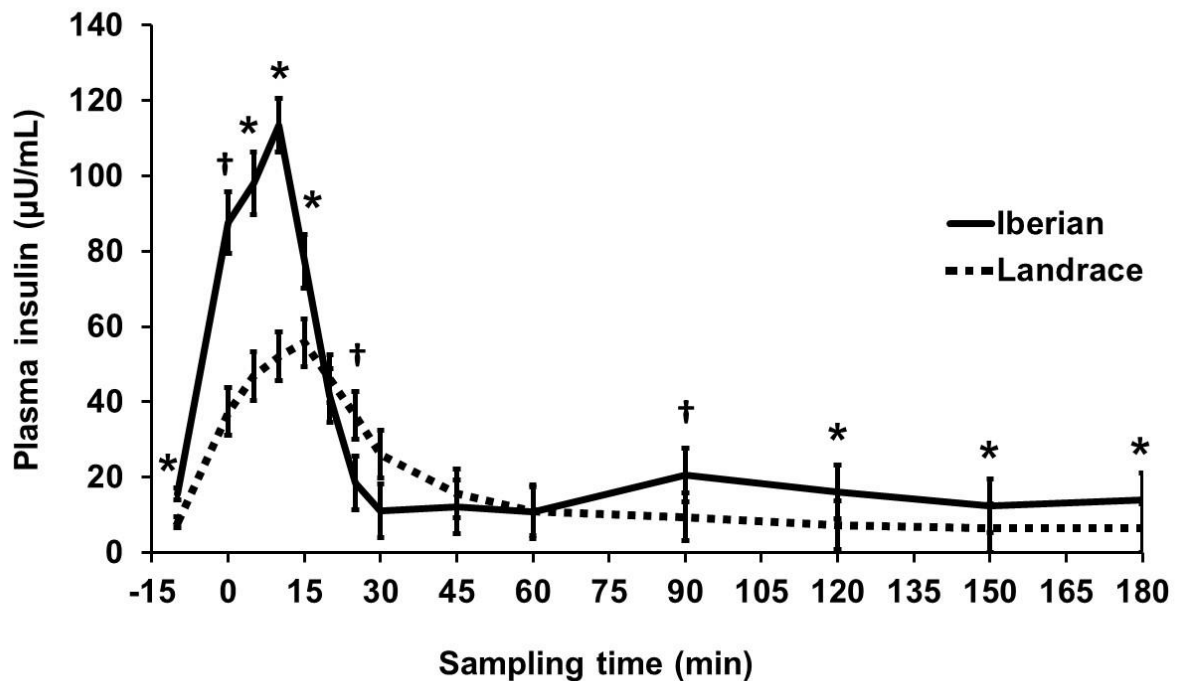

552

553 <sup>1</sup>Significant differences in plasma insulin concentration for each time point expressed

554 as: †0.05 < P < 0.1, \*P < 0.05.

555 <sup>2</sup>Concentrations at time 0 correspond to 20-30 s after glucose bolus injection.

556

557

558

559

560

561

562

563

564 **Figure 2** Plasma glucose concentration before and after intra-arterial glucose

565 tolerance test (500 mg/kg BW) in growing Iberian (n = 4) and Landrace (n = 5)

566 pigs<sup>1,2</sup>.

567

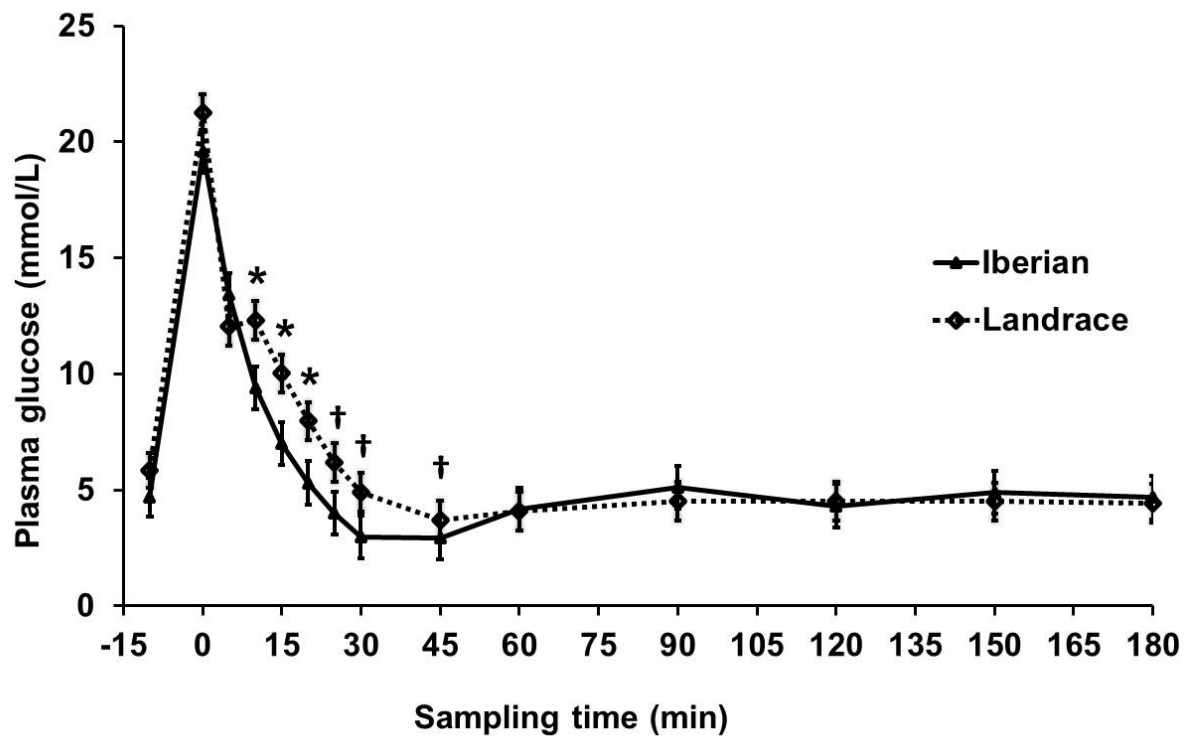

568

569 <sup>1</sup>Significant differences in plasma glucose concentration for each time point expressed

570 as: †0.05 < P < 0.1, \*P < 0.05.

571 <sup>2</sup>Concentrations at time 0 correspond to 20-30 s after glucose bolus injection.

572

573

574

575

576

577

578

579

580

581 **Figure 3** Plasma lactate concentration before and after intra-arterial glucose  
582 tolerance test (500 mg/kg BW) in growing Iberian (n = 4) and Landrace (n = 5)  
583 pigs<sup>1,2</sup>.

584

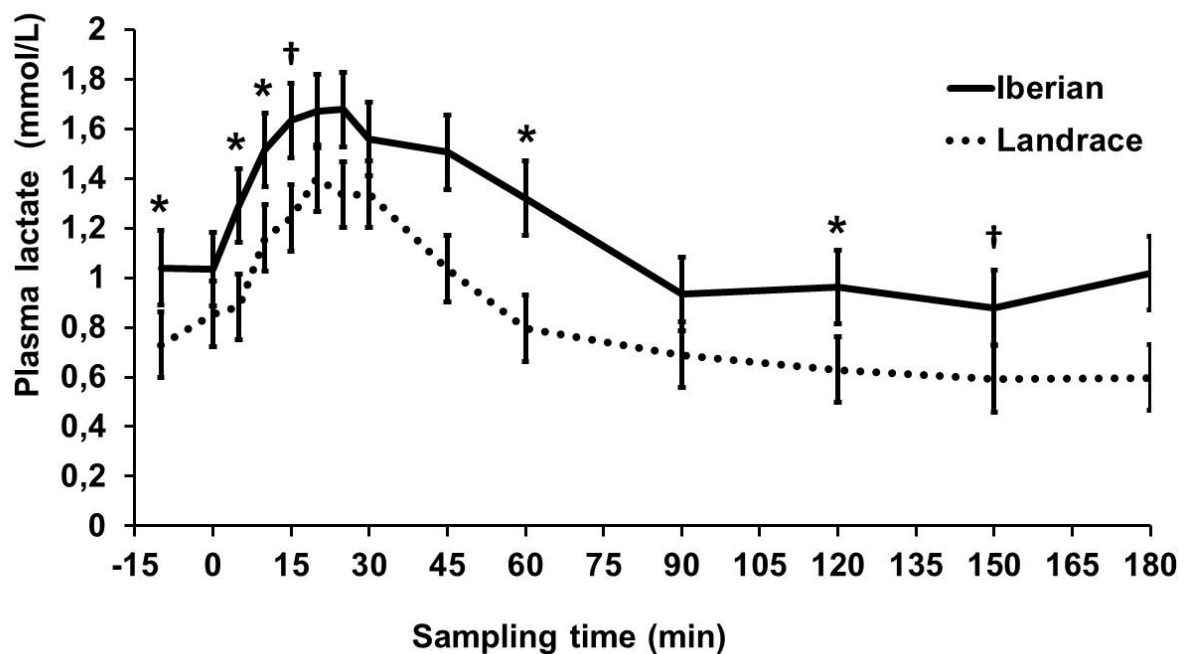

585

586 <sup>1</sup>Significant differences in plasma lactate concentration for each time point expressed  
587 as: †0.05 < P < 0.1, \*P < 0.05.

588 <sup>2</sup>Concentrations at time 0 correspond to 20-30 s after glucose bolus injection.

589

590

591

592

593

594

595

596

597 **Figure 4** Area under the curve (AUC) of plasma insulin concentration during  
598 intra-arterial glucose tolerance test (500 mg/kg BW) between minute 0 and the  
599 time points indicated in growing Iberian (n = 4) and Landrace (n = 5) pigs<sup>1</sup>.

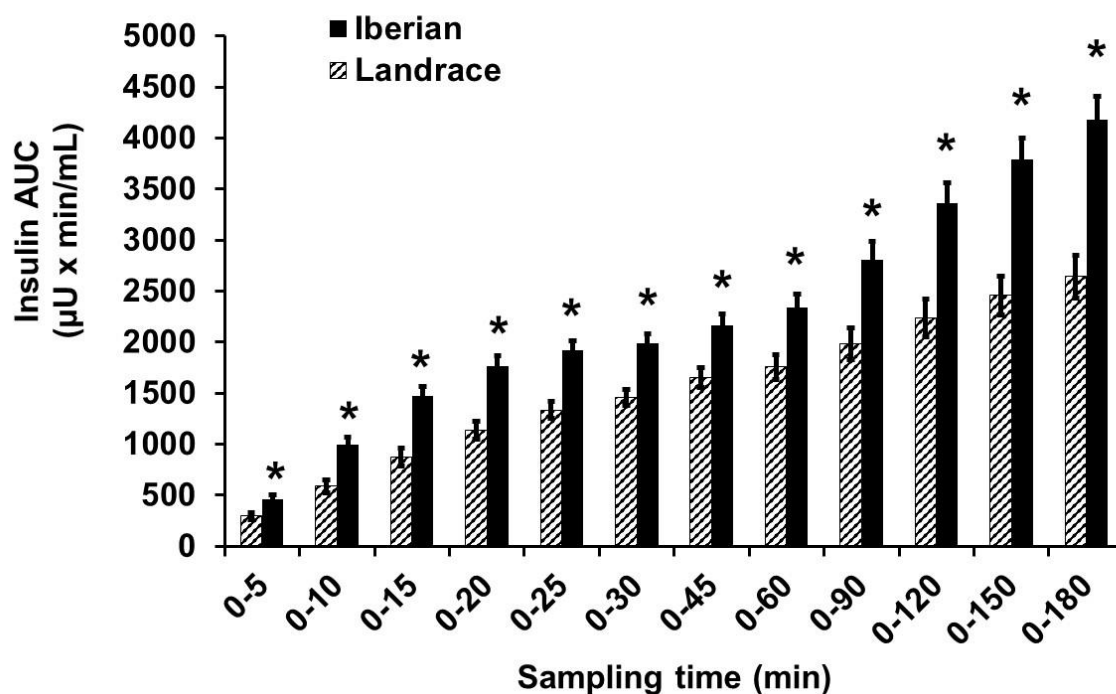

600

601 <sup>1</sup>Differences between breeds: \* $P < 0.05$ .

602

603

604

605

606

607

608

609

610

611

612 **Figure 5** Areas under the curve (AUC) of plasma glucose concentration during

613 intra-arterial glucose tolerance test (500 mg/kg BW) between minute 0 and the

614 time points indicated in growing Iberian (n = 4) and Landrace (n = 5) pigs<sup>1</sup>.

615

616

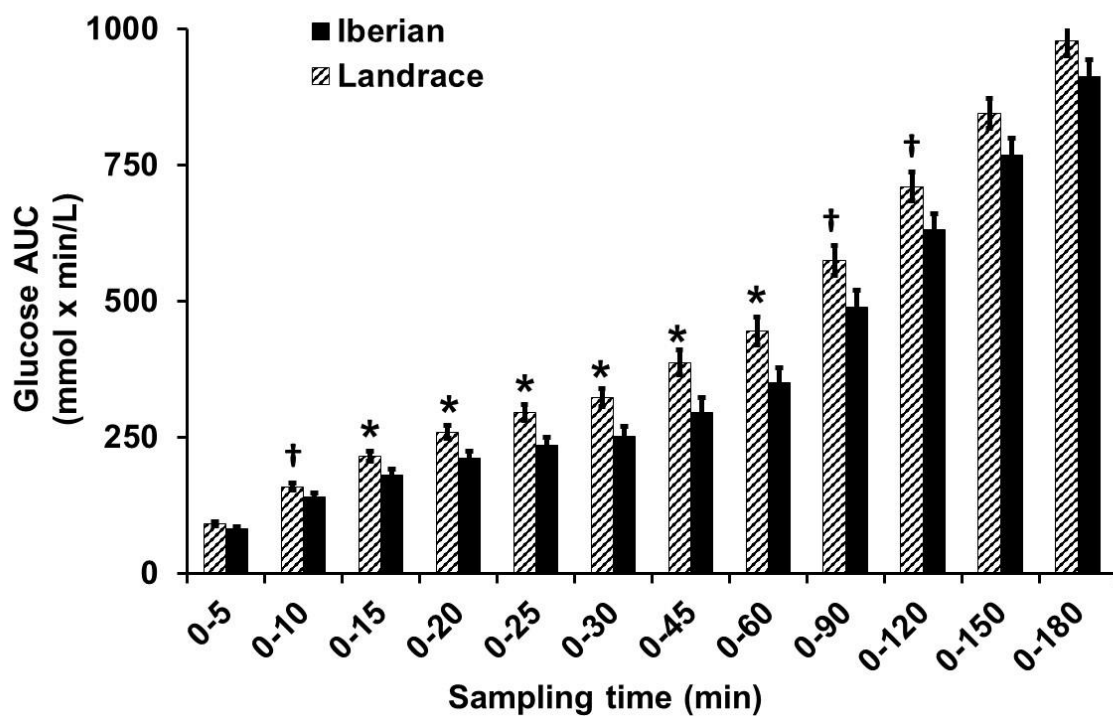

617

618 <sup>1</sup>Differences between breeds: †0.05 < P < 0.1, \*P < 0.05.

619

620

621

622

623

624

625

626 **Figure 6** Area under the curve (AUC) of plasma lactate concentration during an  
627 intra-arterial glucose tolerance test (500 mg/kg BW) between minute 0 and the  
628 time points indicated in growing Iberian (n = 4) and Landrace (n = 5) pigs<sup>1</sup>.

629

630

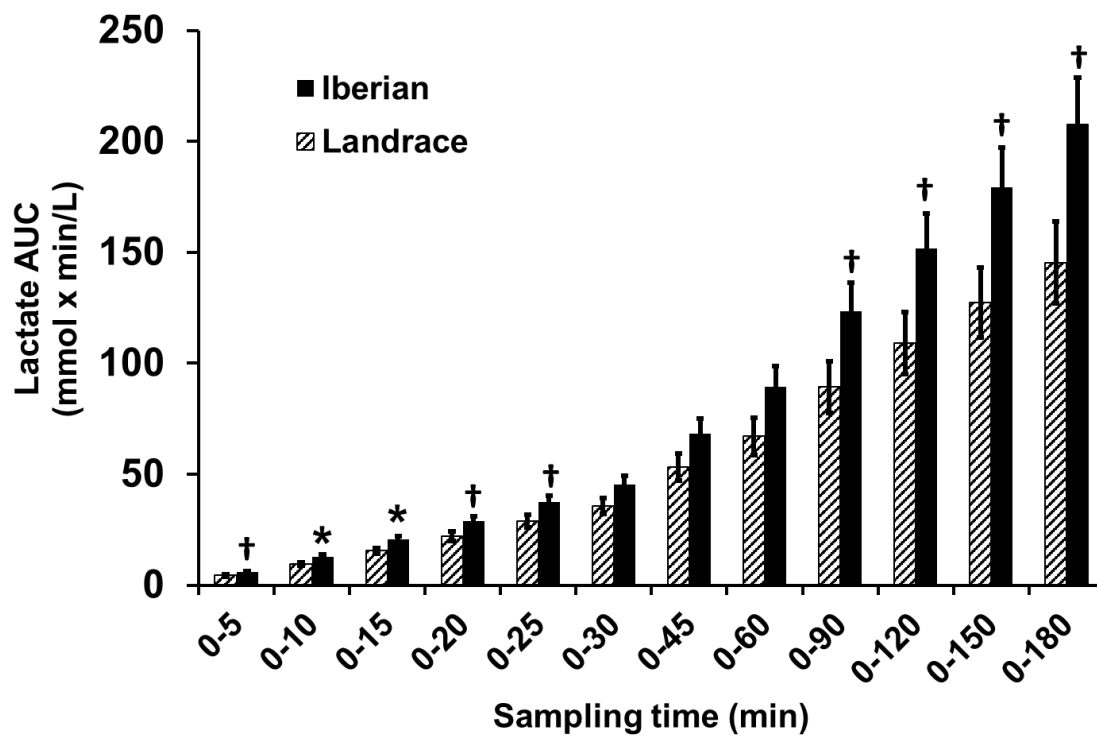

631

632 <sup>1</sup>Differences between breeds: †0.05 < P < 0.1, \*P < 0.05.
